# Supplementary material for: Highly dispersed nickel nitride nanoparticles on nickel nanosheets as an active catalyst for hydrazine electrooxidation
Source: Royal Society of Chemistry journal article supplement (doi:10.1039/c9ta11023b), 2019-11-28
Supplement: c9ta11023b1.pdf [file c9ta11023b1.pdf]

## Electronic Supplementary Information

### **Highly dispersed nickel nitride nanoparticles on nickel nanosheets as an active catalyst for hydrazine electrooxidation**

Xi Lin, He Wen\*, Deng-Xue Zhang, Guo-Xuan Cao and Ping Wang\*

School of Materials Science and Engineering, Key Laboratory of Advanced Energy Storage Materials of Guangdong Province, South China University of Technology, Guangzhou 510641, P.R. China.

E-mails: [mspawang@scut.edu.cn](mailto:mspawang@scut.edu.cn), [mshwenhe@mail.scut.edu.cn](mailto:mshwenhe@mail.scut.edu.cn)

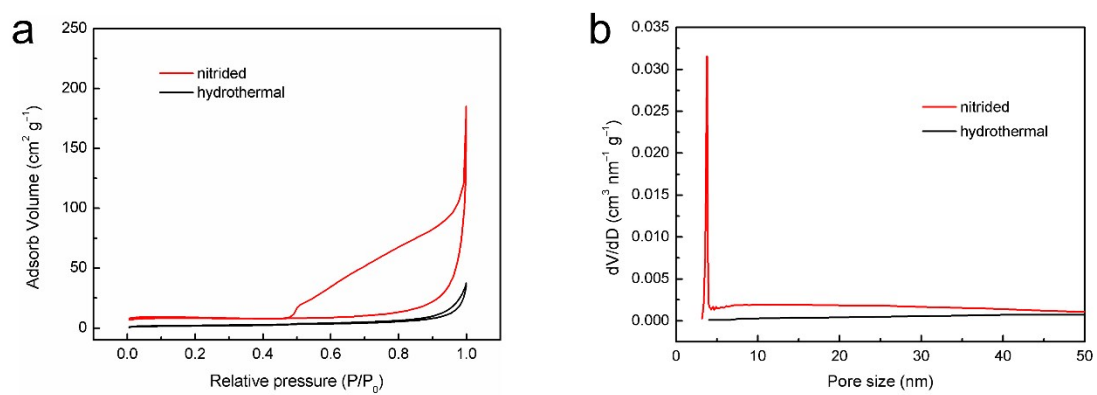

Figure S1. (a)  $N_2$  adsorption/desorption isotherms and (b) the corresponding pore size distribution of the hydrothermal and nitrated catalysts, respectively.

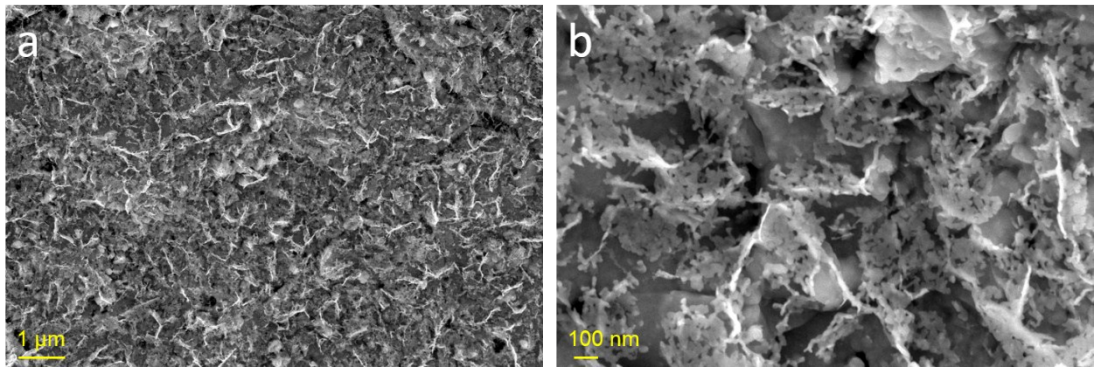

Figure S2. FE-SEM images of the Ni<sub>3</sub>N/NF catalyst at different magnifications.

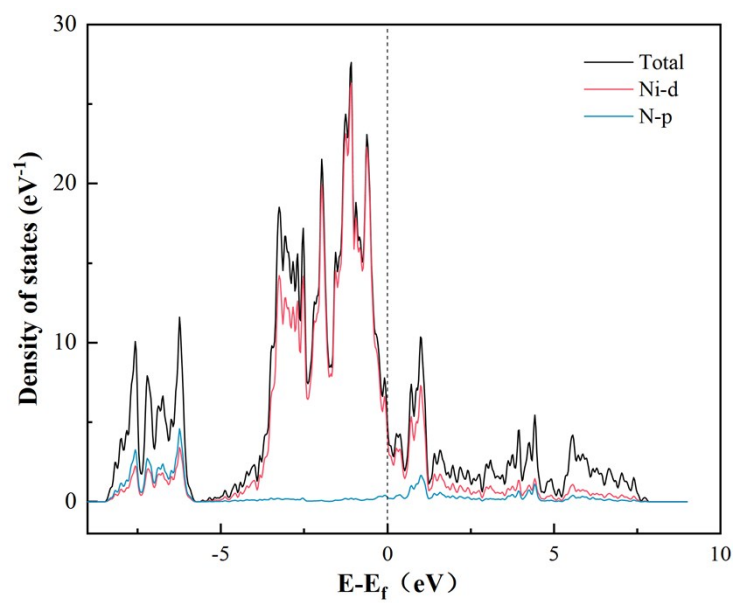

Figure S3. Computed density of states of Ni<sub>3</sub>N. The Fermi level ( $E_F$ ) is set to zero.

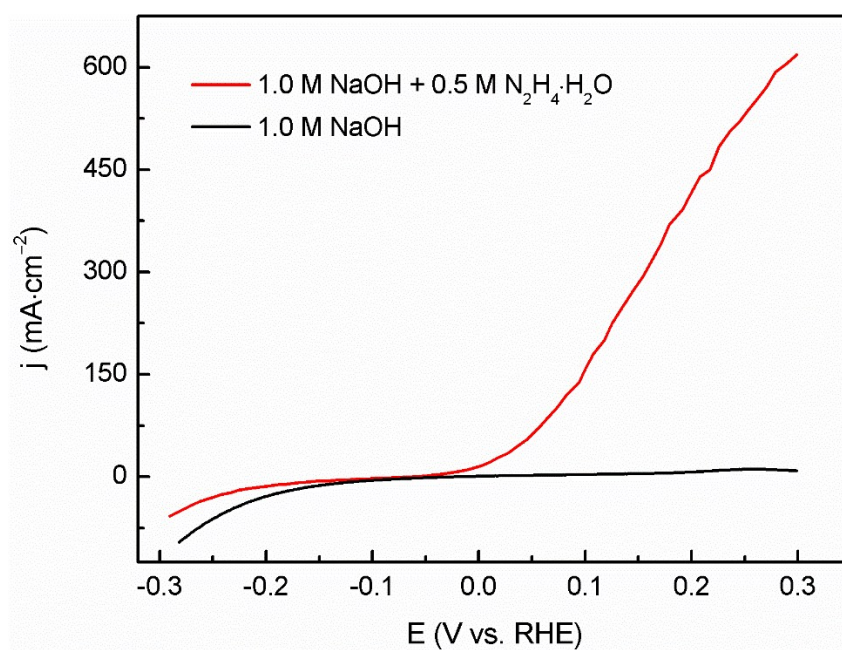

Figure S4. Comparison of the LSV curves of the Ni<sub>3</sub>N/Ni/NF catalyst in an electrolyte with and without N<sub>2</sub>H<sub>4</sub>·H<sub>2</sub>O at a scan rate of 20 mV·s<sup>-1</sup>.

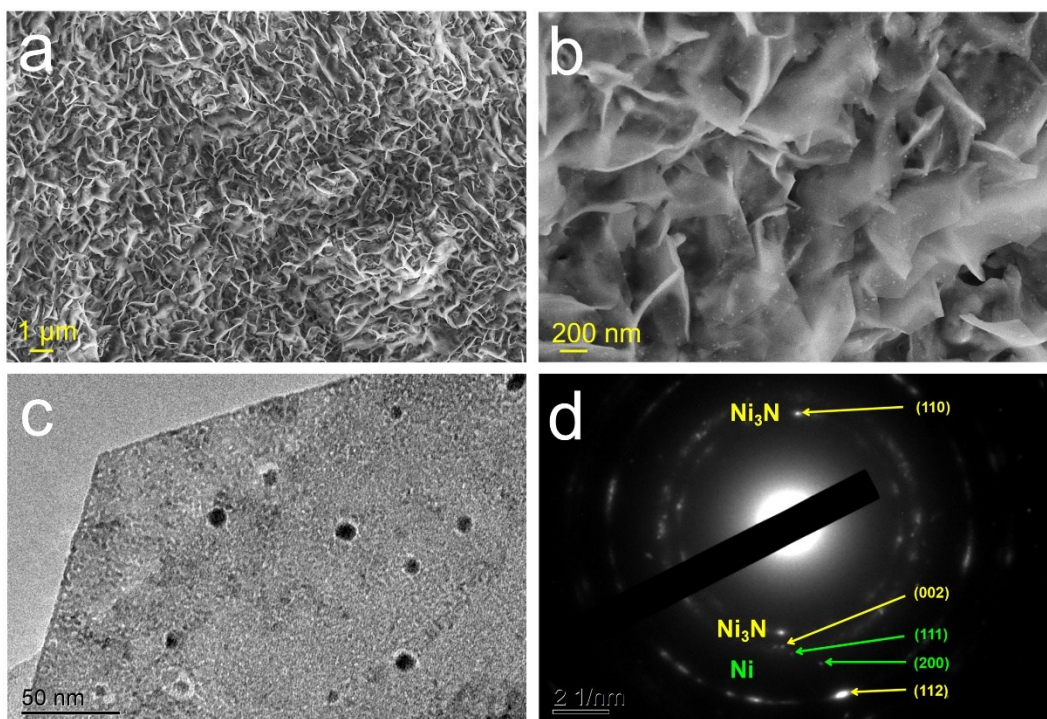

Figure S5. (a,b) FE-SEM images, (c) TEM image and (d) SAED pattern of the post-used Ni<sub>3</sub>N/Ni/NF catalyst after 12 h of constant-current measurement.

Table S1. A comparison of catalytic properties of various catalysts towards hydrazine electrooxidation.

| Sample                                  | Electrolyte                                        | Electrocatalytic performance    |                      | Reference |
|-----------------------------------------|----------------------------------------------------|---------------------------------|----------------------|-----------|
|                                         | [N <sub>2</sub> H <sub>4</sub> ] and [NaOH]<br>(M) | <i>j</i> (mA·cm <sup>-2</sup> ) | <i>E</i> (V vs. RHE) |           |
| Ni <sub>0.6</sub> Co <sub>0.4</sub> /NF | 0.5, 3.0                                           | 292                             | 0.22                 | [1]       |
| Ni-NSA/NF                               | 0.5, 3.0                                           | 228                             | 0.25                 | [2]       |
| Cu film/Cu foil                         | 0.2, 3.0                                           | 135                             | 0.47                 | [3]       |
| CoNi-S/NF                               | 2.0, 0.1                                           | 118                             | 1.0                  | [4]       |
| Ni <sub>2</sub> P/NF                    | 0.1, 1.0                                           | 220                             | 0.10                 | [5]       |
| NiS <sub>2</sub> /TiM                   | 0.5, 1.0                                           | 300                             | 0.22                 | [6]       |
| Ni-Cu/Cu foil                           | 0.1, 3.0                                           | 300                             | 0.47                 | [7]       |
| Ni <sub>x</sub> P/NF (DP)               | 0.1, 1.0                                           | 580                             | 0.30                 | [8]       |
| Ni-B/NF                                 | 0.1, 1.0                                           | 340                             | 0.30                 | [9]       |
| Ni-Zn/NF                                | 0.1, 1.0                                           | 225                             | 0.30                 | [10]      |
| Pd-porous Ni/NF                         | 0.1, 1.0                                           | 450                             | 0.30                 | [11]      |
| Ni <sub>3</sub> N/Ni/NF                 | 0.5, 1.0                                           | 623                             | 0.30                 | This work |

## References

- 1 G. Feng, Y. Kuang, P. Li, N. Han, M. Sun, G. Zhang and X. Sun, *Adv. Sci.*, 2017, **4**, 1600179.
- 2 Y. Kuang, G. Feng, P. Li, Y. Bi, Y. Li and X. Sun, *Angew. Chem. Int. Ed.*, 2016, **55**, 693–697.
- 3 Z. Lu, M. Sun, T. Xu, Y. Li, W. Xu, Z. Chang, Y. Ding, X. Sun and L. Jiang, *Adv. Mater.*, 2015, **27**, 2361–2366.
- 4 L. Zhou, M. Shao, C. Zhang, J. Zhao, S. He, D. Rao, M. Wei, D. G. Evans and X. Duan, *Adv. Mater.*, 2017, **29**, 1604080.
- 5 C. Tang, R. Zhang, W. Lu, Z. Wang, D. Liu, S. Hao, G. Du, A. M. Asiri and X. Sun, *Angew. Chem. Int. Ed.*, 2017, **56**, 842–846.
- 6 J. Wang, X. Ma, T. Liu, D. Liu, S. Hao, G. Du, R. Kong, A. M. Asiri and X. Sun, *Mater. Today Energy*, 2017, **3**, 9–14.
- 7 M. Sun, Z. Lu, L. Luo, Z. Chang and X. Sun, *Nanoscale*, 2016, **8**, 1479–1484.
- 8 H. Wen, L. Gan, H. Dai, X. Wen, L. Wu, H. Wu and P. Wang, *Appl. Catal. B: Environ.*, 2019, **241**, 292–298.
- 9 X. Wen, H. Dai, L. Wu and P. Wang, *Appl. Surf. Sci.*, 2017, **409**, 132–139.
- 10 L. Wu, H. Dai, X. Wen and P. Wang, *ChemElectroChem*, 2017, **4**, 1944–1949.
- 11 L. Wu, X. Wen, H. Wen, H. Dai and P. Wang, *J. Power Sources*, 2019, **412**, 71–77.
